# Supplementary material
Source: Elsevier journal article supplement (https://www.sciencedirect.com/science/article/pii/S0213911118301584)
Supplement: mmc1 [file S0213911118301584:mmc1.pdf]

### **La formación en Enfermería Comunitaria: una constante histórica y una opción de mejora actual. (Por Enrique Oltra Rodríguez)**

La intervención comunitaria y la formación para capacitarse en ello es algo inherente a la propia profesión enfermera, en la concepción moderna de la enfermería desde un principio estuvo presente el concepto de enfermera comunitaria. Destaca como hito inicial, a mediados del S. XIX la Escuela de Enfermeras de distrito de Liverpool promovida, entre otros, por la considerada como primera promotora de la enfermería moderna, la misma Florence Nightingale. Este modelo tuvo gran éxito y se expandió por el mundo anglosajón destacando en Nueva York a finales de dicho siglo la figura de Lillian Wald quien lideró en Estados Unidos el proceso de creación de escuelas y que fue la primera en acuñar el término de “Enfermera de Salud Pública”, término que se utilizaría hasta que en 1974 la OMS lo abandona y comienza a utilizar el de “Enfermera Comunitaria”.

En España desde finales del S. XIX y principios del S. XX, con la aparición de Concepción Arenal en el mundo de la política en el que muestra gran interés por la salud de la población, los aspectos sociales, la organización sanitaria y el nexo entre todos ellos, comienza a avanzar en la formación y profesionalización de las enfermeras y aparece la figura de lo que se llamaron Enfermeras Sanitarias Visitadoras o Enfermeras de Salud Pública, llegando en junio de 1936 a concretarse la formación de estas profesionales en el marco de la Escuela Nacional de Sanidad, proyecto que fue suspendido por el inicio de la Guerra Civil.

Ya en tiempos más recientes cuando en 1977 la enfermería española entra en la Universidad, ya desde el primer plan de estudios<sup>1</sup> se contempló la formación en Salud Pública en dos asignaturas anuales, la impartida en 2º curso hacía referencia por una parte a la educación sexual y dice también que en esa asignatura se “ha de abarcar también el estudio del medio social, económico y cultural en que se mueven los miembros de una determinada comunidad por el importante papel que ejerce sobre el mantenimiento de la salud y los condicionamientos de la enfermedad”, el programa de la asignatura que se impartía en 3º curso establecía que “debía comprender aspectos y metodología necesarios para que el diplomado sea un agente activo en la educación sanitaria de la comunidad”

En 1990 los planes de estudios de la Diplomatura en Enfermería sufren una modificación<sup>2</sup> pero sigue manteniendo que el diplomado en enfermería debe tener “un conocimiento adecuado de las relaciones que existen entre el estado de salud y el entorno físico y social del ser humano” y establece una asignatura denominada Enfermería Comunitaria y Ecología Humana, con unos contenidos orientados hacia ello.

Avanzando en el tiempo y llegando al momento actual, los estudios de enfermería, junto con el resto de estudios universitarios, tuvieron que adaptarse en los curso 2009-10 y 2010-11 al Espacio Europeo de Educación Superior y la Diplomatura en Enfermería dio paso a la titulación de Grado en Enfermería<sup>3</sup>. La normativa que regula dichos estudios sigue estableciendo competencias específicas en Enfermería Comunitaria y su adquisición ocupa una parte importante de los créditos de formación, estableciéndose las asignaturas de carácter obligatorio Enfermería Comunitaria I y II, y dependiendo de las distintas Facultades también se ofrecen asignaturas optativas en esta línea como Intervención Comunitaria y otras. En cuanto a la formación práctica, en todas las Facultades se realizan rotatorios del Prácticum en centros

de Atención Primaria, sin embargo va a depender de las actividades que se realicen en estos, el que los estudiantes observen y participen en intervenciones comunitarias, y generalmente este tipo de intervenciones es muy escasa por lo que se pierde la oportunidad de que conozcan recursos comunitarios como asociaciones, organizaciones no gubernamentales, concejalías, centros socio-sanitarios, centros deportivos...

En cuanto a la formación especializada en enfermería cabe destacar que en los programas oficiales de todas las especialidades desarrolladas hasta el momento, a falta de Enfermería Médico Quirúrgica, existe una perspectiva comunitaria en el área específico de cada una, si bien la especialidad que asume la intervención comunitaria por propia identidad es la Enfermería Familiar y Comunitaria<sup>4</sup> impregnando de la misma todo su programa y dedicándole varios epígrafes y el importante apartado 6 de Competencias en Salud Pública y Comunitaria. Sin embargo y dado que la formación especializada en España sigue el modelo de la formación en servicios, los responsables de las Unidades Docentes se encuentran con la dificultad de encontrar las prácticas profesionales y los entornos de aprendizaje adecuados para la adquisición de estas competencias en salud comunitaria, especialmente porque el sistema sanitario no contempla este tipo de intervención más allá de casos puntuales que rozan lo anecdótico.

Que los especialistas se formen en estas competencias comunitarias supone recurrir a recursos específicos que se pueden encontrar en servicios sociales, municipales, de organizaciones no gubernamentales, entre otros y establecer relaciones formales con esas entidades no siempre es sencillo y una vez establecidas también es difícil conseguir dinámicas que consigan los objetivos docentes planteados.

A estos déficits de recursos con los que establecer convenios docentes, se suma el hecho de que muchas Unidades Docentes al transformarse desde las de Medicina Familiar y Comunitaria a las de Atención Familiar y Comunitaria han continuado con una inercia tradicional donde la formación en salud comunitaria no estaba presente o lo estaba en pequeña medida. Esta es una pérdida sentida tanto por residentes como por responsables de dichas unidades docentes y es una pérdida que también se evidencia en el enfoque de los proyectos de investigación que los residentes deben diseñar a lo largo de su formación. Las Unidades Docentes Multiprofesionales, lejos de asumir y difundir las aportaciones novedosas e idiosincráticas de la especialidad enfermera como una oportunidad de mejora, más bien las ha fagocitado y acomodado al modo en que se ha venido entendiendo hegemonícamente la medicina de familia.

Las enfermeras tanto generalistas como especialistas, con una conceptualización y una capacitación en salud comunitaria más o menos óptima pero siempre presente, se encuentran cuando dan el paso a su integración al mundo laboral con un sistema biomédico y farmacocéntrico, basado en la enfermedad como problema y en la tecnología como respuesta, en el que el abordaje es individual y en el que no se contempla ningún enfoque comunitario y que en la mayoría de los casos ni siquiera cabe aunque alguien lo contemple. La distribución de tiempos y recursos, y el aprendizaje vicario hacen que lo aprendido en sus ciclos formativos sea desechado como modelo práctico de intervención y quede en poco más que una curiosidad como otras muchas.

Lo anteriormente expuesto junto a la tímida o nula incorporación de especialistas en Enfermería Familiar y Comunitaria y el hecho de que cuando se incorporan no lo hacen a puestos específicos con competencias especialistas bien definidas, contribuye a que el sistema sanitario no se vea beneficiado de las aportaciones que podrían hacer también en intervención comunitaria. Ha habido quien planteó la incorporación de la especialidad de Enfermería Familiar y Comunitaria como una oportunidad de iniciar la reforma de la Atención Primaria que tanto se está necesitando, pero tal y como se está haciendo es posible que se diluya la oportunidad y acabe perdiéndose. Al sistema sanitario y sobre todo la sociedad se les está privando de esta necesaria aportación.

---

<sup>1</sup> Orden del Ministerio de Educación y Ciencia de 31 de octubre de 1977, por la que se dictan directrices para la elaboración de Planes de estudios de las Escuelas Universitarias de Enfermería. Boletín Oficial del Estado número 283 de 26 de noviembre de 1977

<sup>2</sup> Real Decreto 1466/1990, de 26 de octubre, por el que se establece el título universitario oficial de Diplomado en Enfermería y las directrices generales propias de los planes de estudios conducentes a la obtención de aquel. Boletín Oficial del Estado número 278 de 20 de noviembre de 1990

<sup>3</sup> ORDEN CIN/2134/2008, de 3 de julio, por la que se establecen los requisitos para la verificación de los títulos universitarios oficiales que habiliten para el ejercicio de la profesión de Enfermero. Boletín Oficial del Estado número 174 de 19 julio 2008

<sup>4</sup> Orden SAS/1729/2010, de 17 de julio, por la que se aprueba y publica el programa formativo de la especialidad de Enfermería Familiar y Comunitaria. Boletín Oficial del Estado número 157 de 29 de junio de 2010.
